# Supplementary material for: Reactive intermediates in copanlisib metabolism identified by LC-MS/MS: phase I metabolic profiling
Source: Royal Society of Chemistry journal article supplement (doi:10.1039/c8ra10322d), 2019-01-01
Supplement: c8ra10322d1.pdf [file c8ra10322d1.pdf]

## Supplementary data

### 1- *In vitro* phase I metabolites of copanlisib.

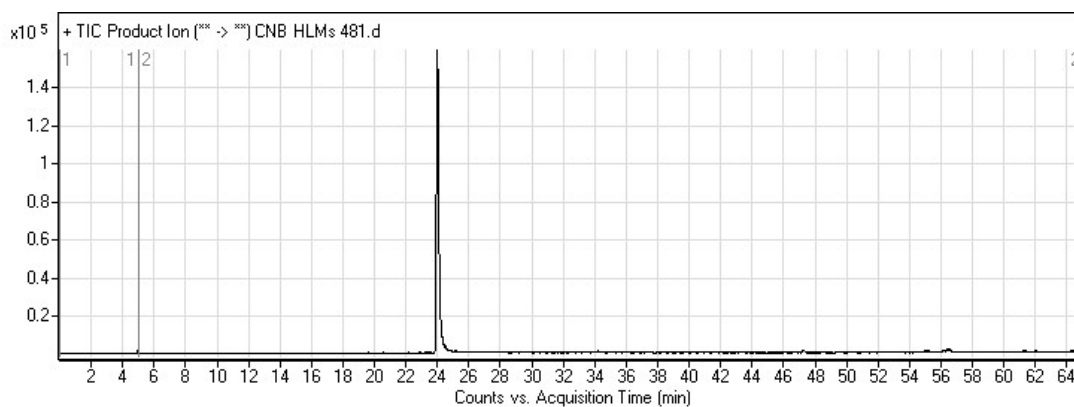

**Fig. S1:** PI chromatogram of PIP at  $m/z$  481 showing CNB peak at 24.4 min.

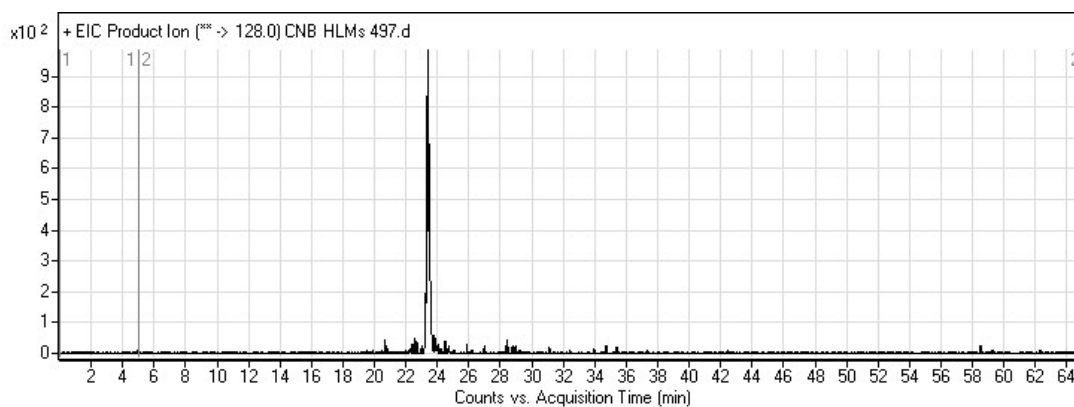

**Fig. S2:** PI chromatogram of CNB497a and CNB497b peaks at 23.4 min and 23.8, respectively,

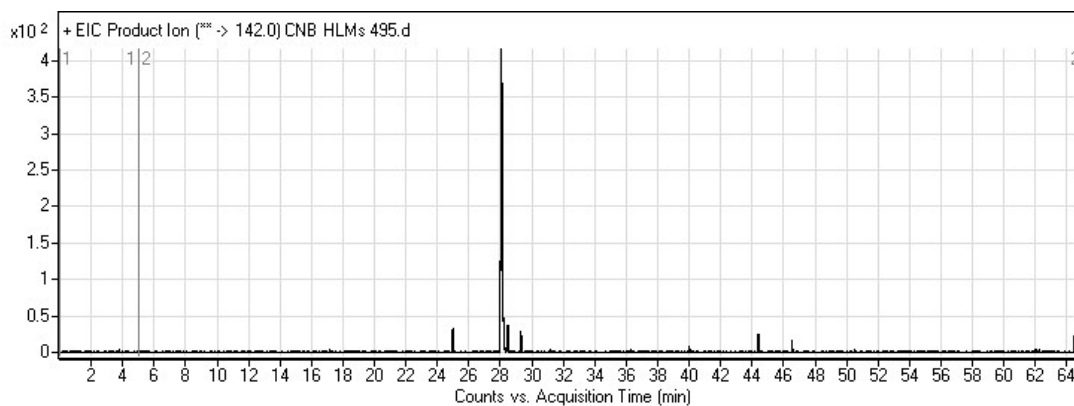

**Fig. S3:** PI chromatogram of CNB495 peak at 28.0 min.

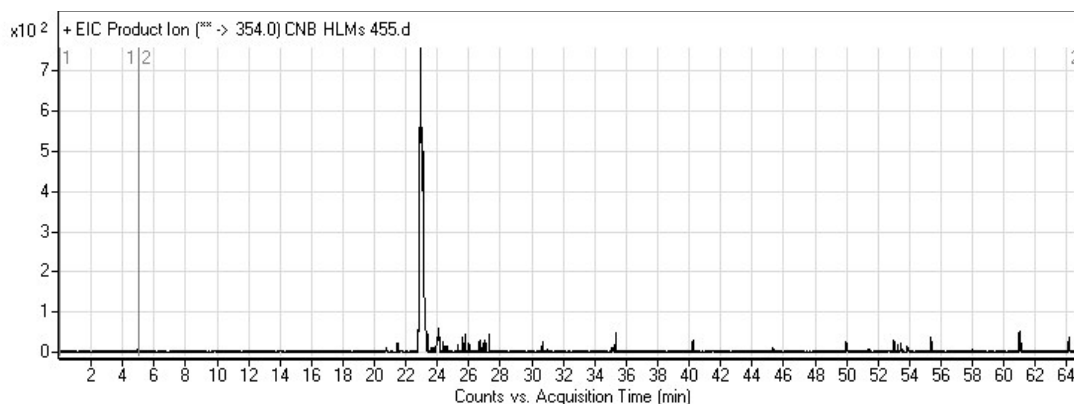

**Fig. S4:** PI chromatogram of CNB455 peak at 23.0 min.

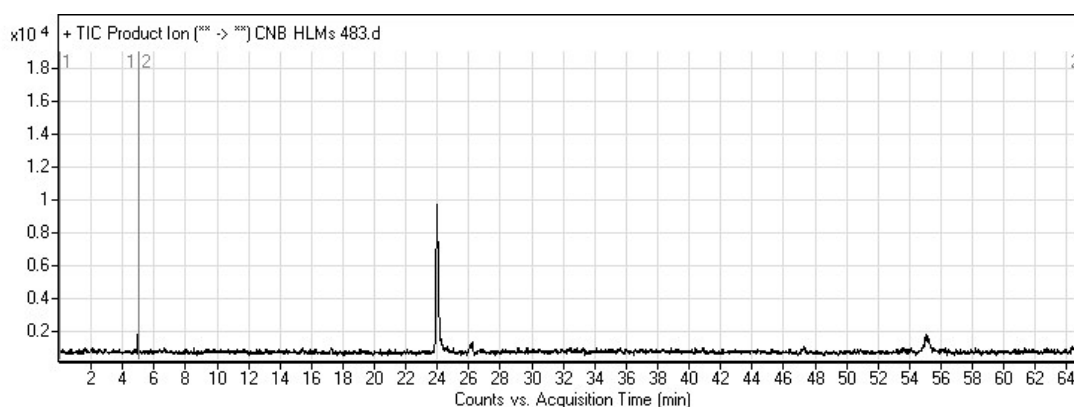

**Fig. S5:** PI chromatogram of CNB483a and CNB483b peaks at 24.1 min and 26.1 min, respectively (A).

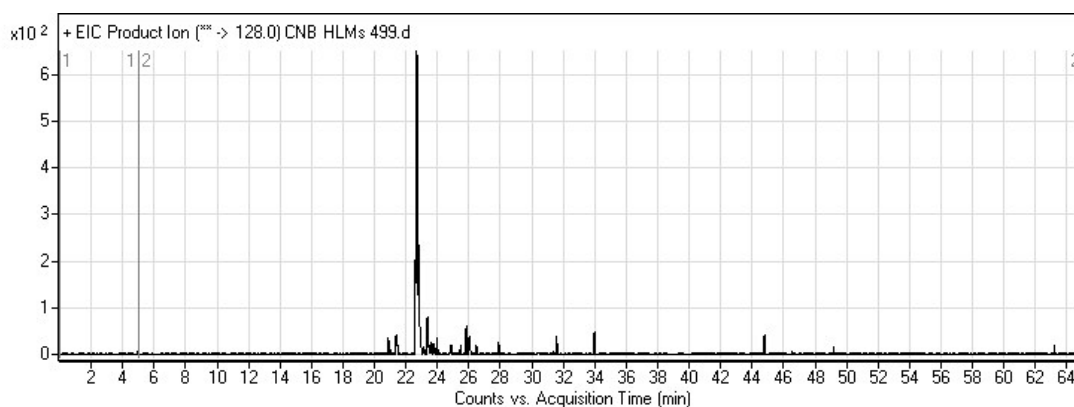

**Fig. S6:** PI chromatogram of PIP CNB499 peak at 22.6 min.

## 2- Reactive intermediates of copanlisib:

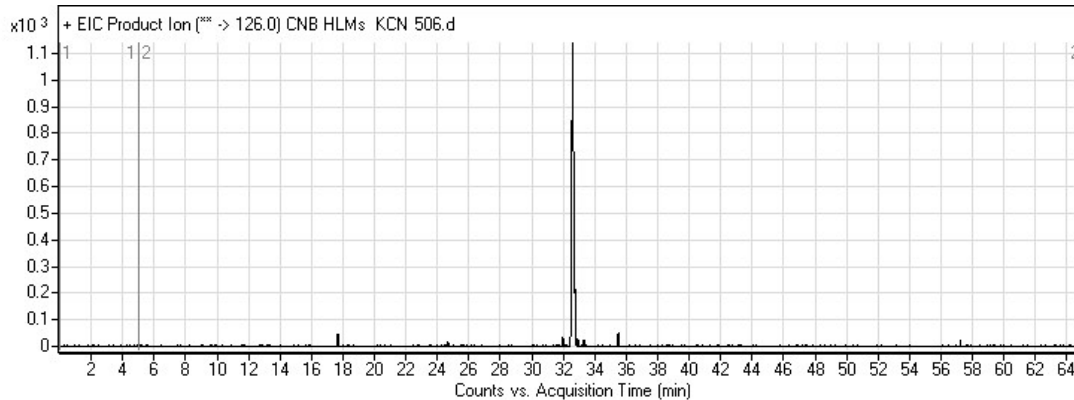

Fig. S7: PI chromatogram of CNB506 peak at 32.6 min (A).

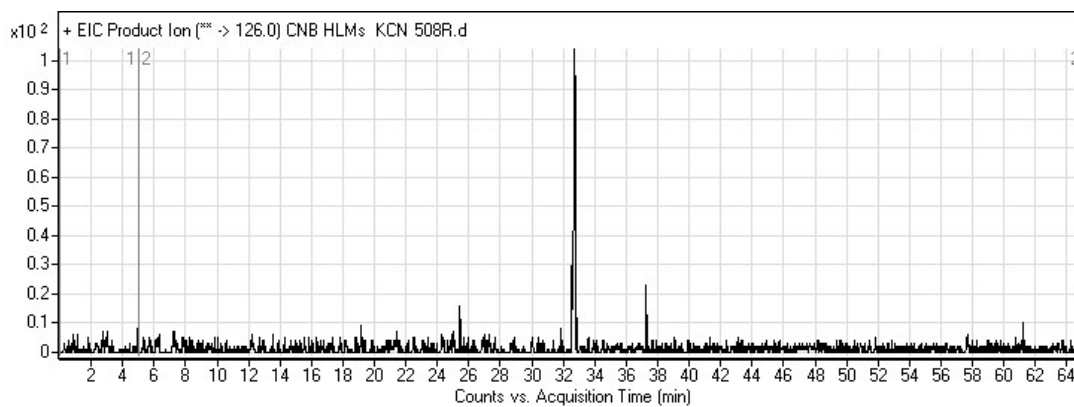

Fig. S8: PI chromatogram of CNB508 peak at 32.7 min.

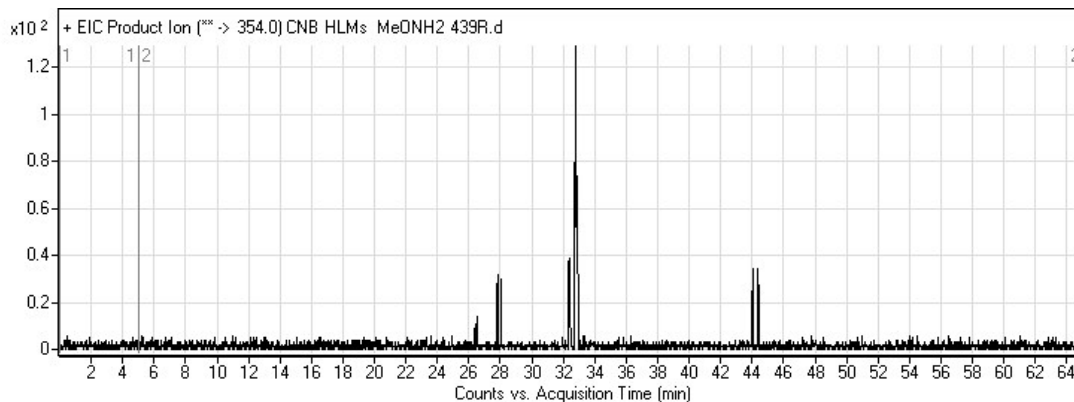

Fig. S9: PI chromatogram of CNB439 peak at 32.8 min.

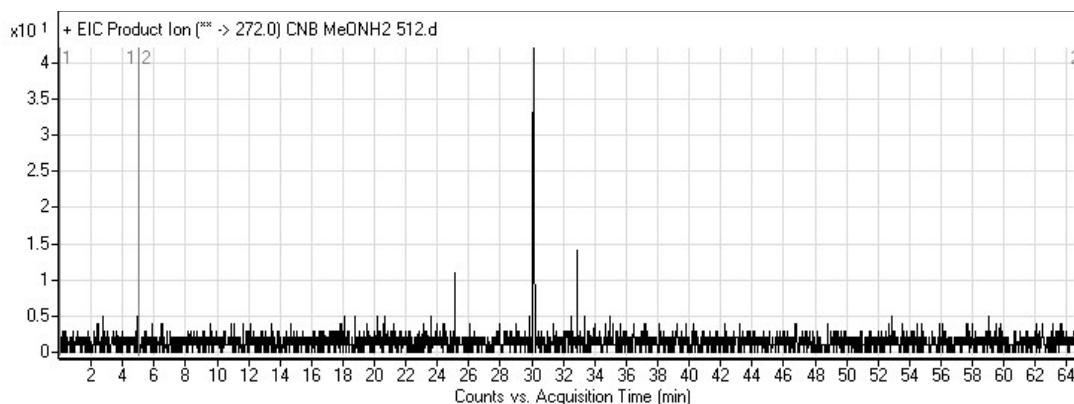

**Fig. S10:** PI chromatogram of CNB512 peak at 30.2 min.

### 3- Control chromatograms of copanlisib.

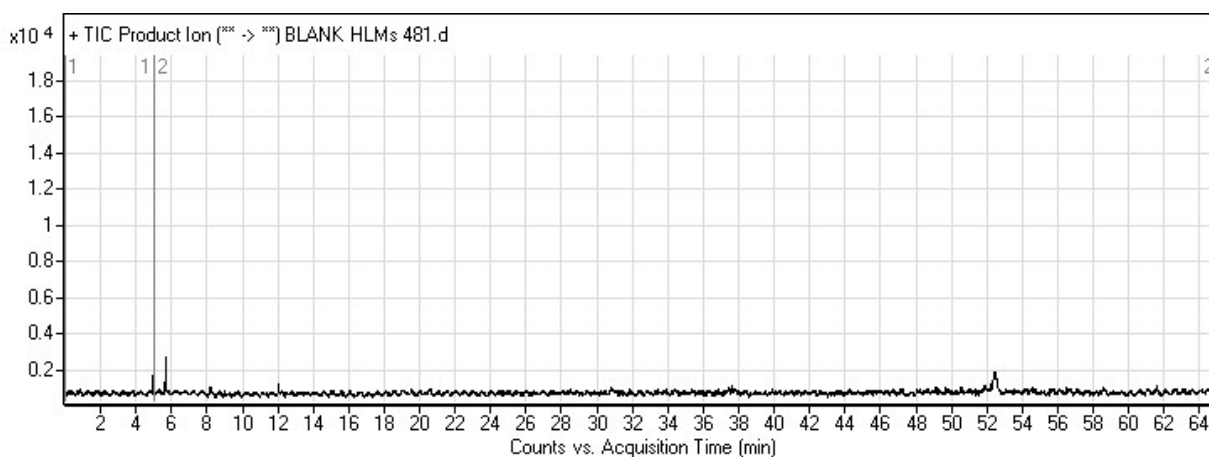

**Fig. S11:** PI chromatogram of PIP at  $m/z$  481 showing the absence of CNB peak at 24.4 min.

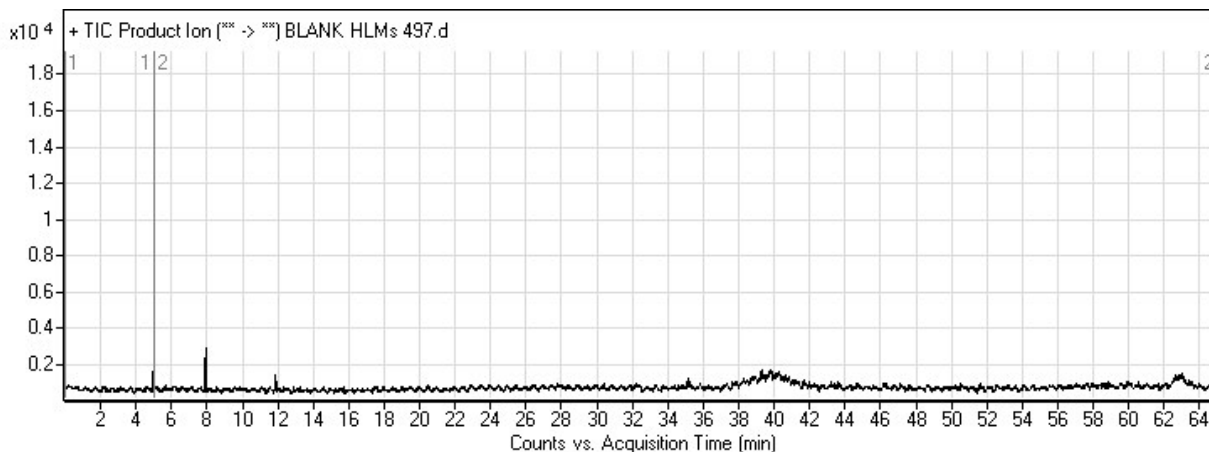

**Fig. S12:** PI chromatogram showing the absence of CNB497a and CNB497b peaks at 23.4 min and 23.8, respectively,

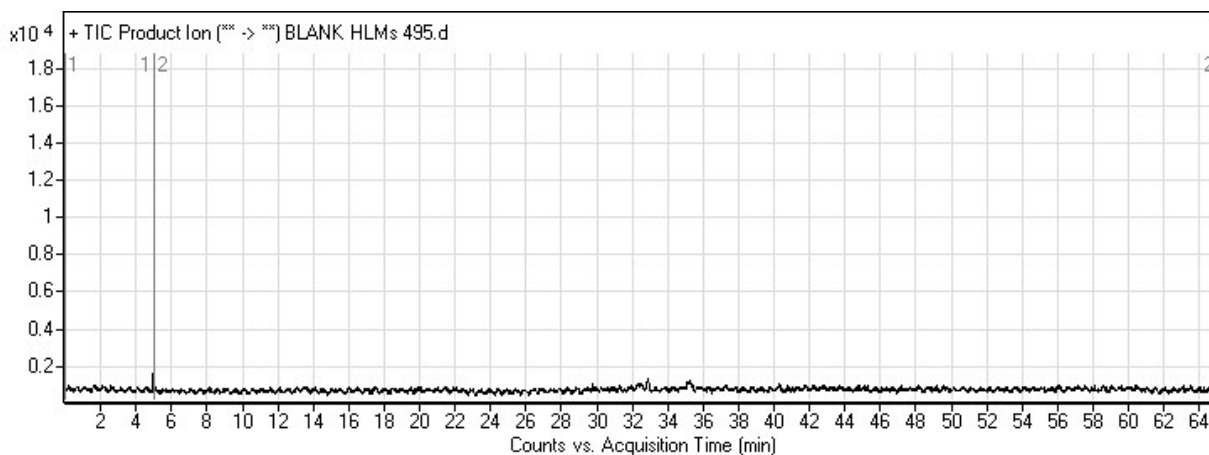

**Fig. S13:** PI chromatogram showing the absence of CNB495 peak at 28.0 min.

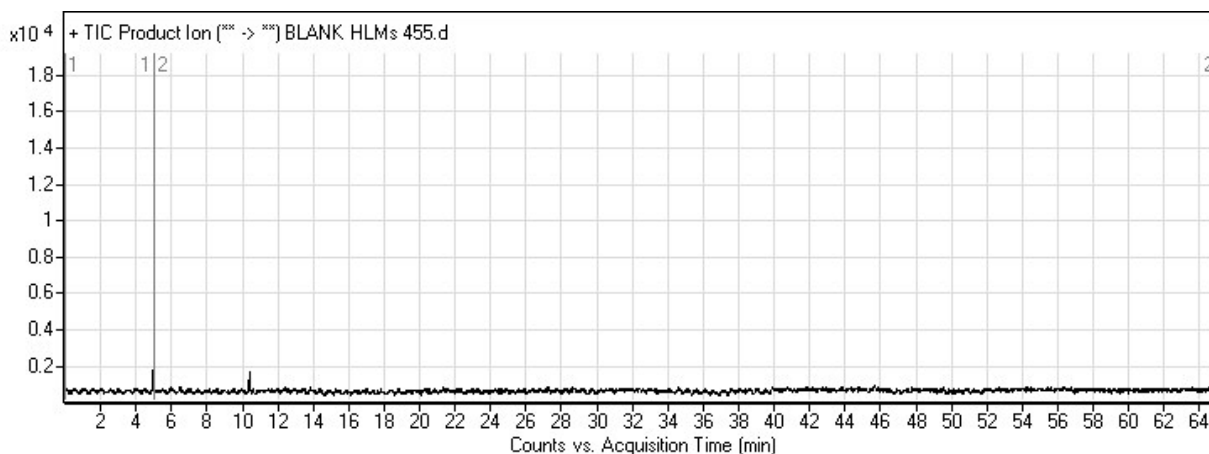

**Fig. S14:** PI chromatogram showing the absence of CNB455 peak at 23.0 min.

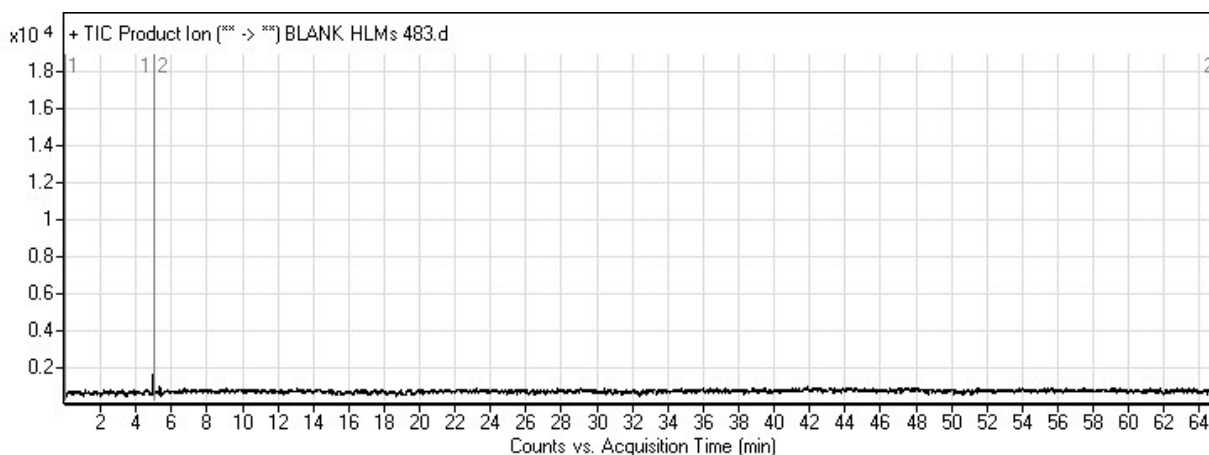

**Fig. S15:** PI chromatogram showing the absence of CNB483a and CNB483b peaks at 24.1 min and 26.1 min, respectively (A).

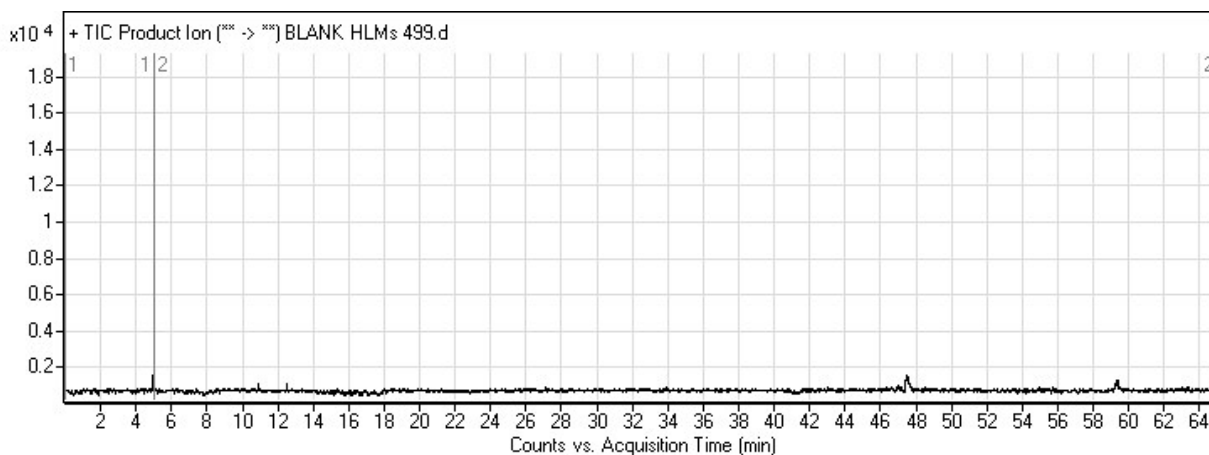

**Fig. S16:** PI chromatogram showing the absence of PIP CNB499 peak at 22.6 min.

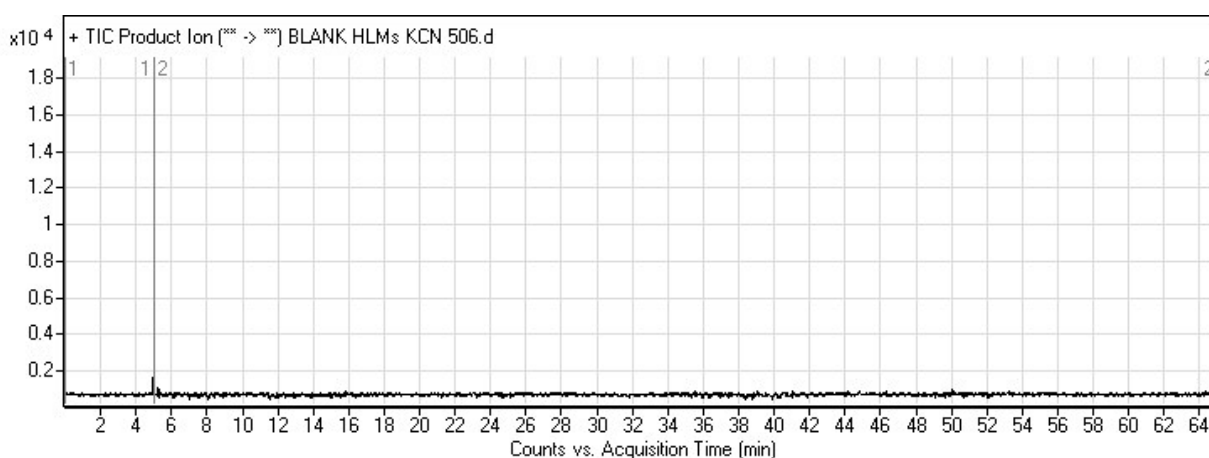

**Fig. S17:** PI chromatogram showing the absence of CNB506 peak at 32.6 min (A).

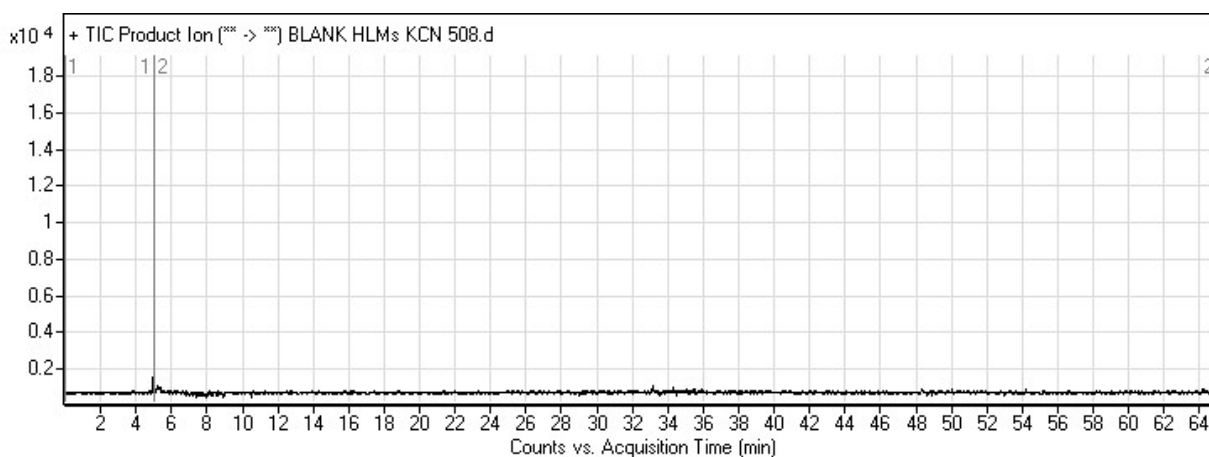

**Fig. S18:** PI chromatogram showing the absence of CNB508 peak at 32.7 min.

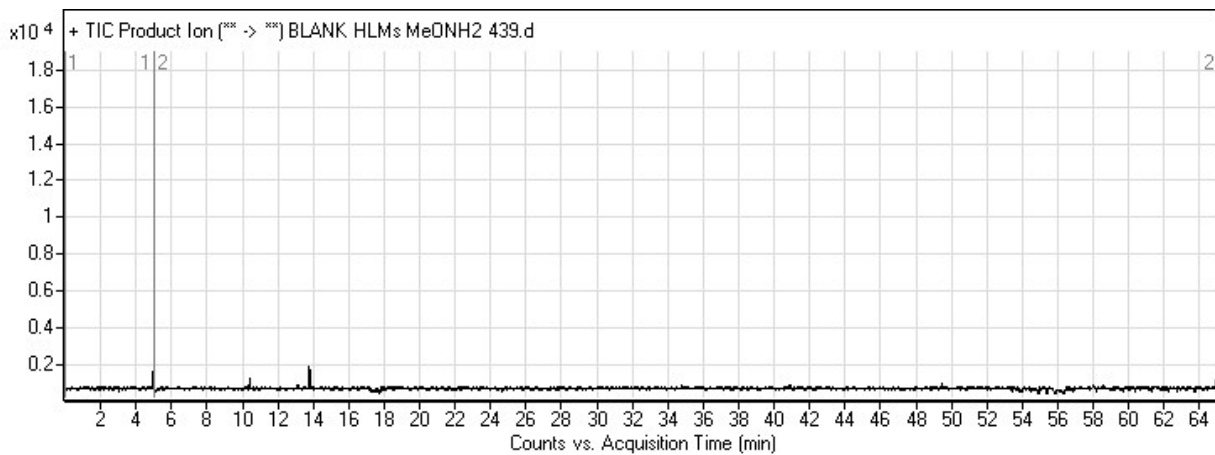

**Fig. S19:** PI chromatogram showing the absence of CNB439 peak at 32.8 min.

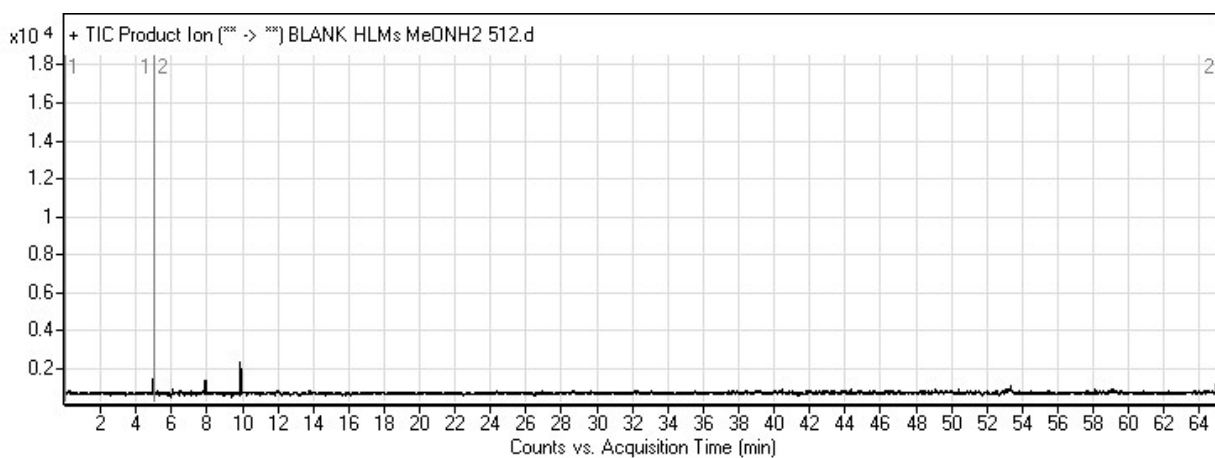

**Fig. S20:** PI chromatogram showing the absence of CNB512 peak at 30.2 min.
